# Supplementary material for: Herbal Polyphenols as Selenium Reducers in the Green Synthesis of Selenium Nanoparticles: Antibacterial and Antioxidant Capabilities of the Obtained SeNPs
Source: MDPI journal article supplement (doi:10.3390/molecules29081686), 2024-04-09
Supplement: s1 [file s1]

## *Supplementary material*

# Herbal polyphenols as selenium reducers in the green synthesis of selenium nanoparticles. Antibacterial and antioxidant capabilities of the obtained SeNPs

Aleksandra Sentkowska, Julia Konarska , Jakub Szmytke, Anna Grudniak

Table 1S Size and polydispersity index (PDI) of obtained SeNPs.

|                   | Average size [nm] | PDI   |
|-------------------|-------------------|-------|
| <b>Blackberry</b> |                   |       |
| SeNPs11           | 96.8              | 0.150 |
| SeNPs11H          | 157               | 0.187 |
| SeNPs12           | 169               | 0.211 |
| SeNPs12H          | 171               | 0.268 |
| SeNPs13           | 175               | 0.309 |
| SeNPs13H          | 182               | 0.341 |
| <b>Hop</b>        |                   |       |
| SeNPs11           | 84.9              | 0.109 |
| SeNPs11H          | 120               | 0.115 |
| SeNPs12           | 143               | 0.154 |
| SeNPs12H          | 165               | 0.195 |
| SeNPs13           | 170               | 0.322 |
| SeNPs13H          | 175               | 0.271 |
| <b>Lemon balm</b> |                   |       |
| SeNPs11           | 79.0              | 0.103 |
| SeNPs11H          | 115               | 0.121 |
| SeNPs12           | 85                | 0.111 |
| SeNPs12H          | 158               | 0.210 |
| SeNPs13           | 113               | 0.172 |
| SeNPs13H          | 162               | 0.261 |
| <b>Raspberry</b>  |                   |       |
| SeNPs11           | 74.0              | 0.132 |
| SeNPs11H          | 84.1              | 0.175 |
| SeNPs12           | 109               | 0.184 |
| SeNPs12H          | 167               | 0.190 |
| SeNPs13           | 124               | 0.141 |
| SeNPs13H          | 181               | 0.263 |
| <b>Sage</b>       |                   |       |
| SeNPs11           | 74.0              | 0.125 |
| SeNPs11H          | 93.1              | 0.212 |
| SeNPs12           | 164               | 0.190 |
| SeNPs12H          | 173               | 0.231 |
| SeNPs13           | 179               | 0.333 |
| SeNPs13H          | 182               | 0.397 |

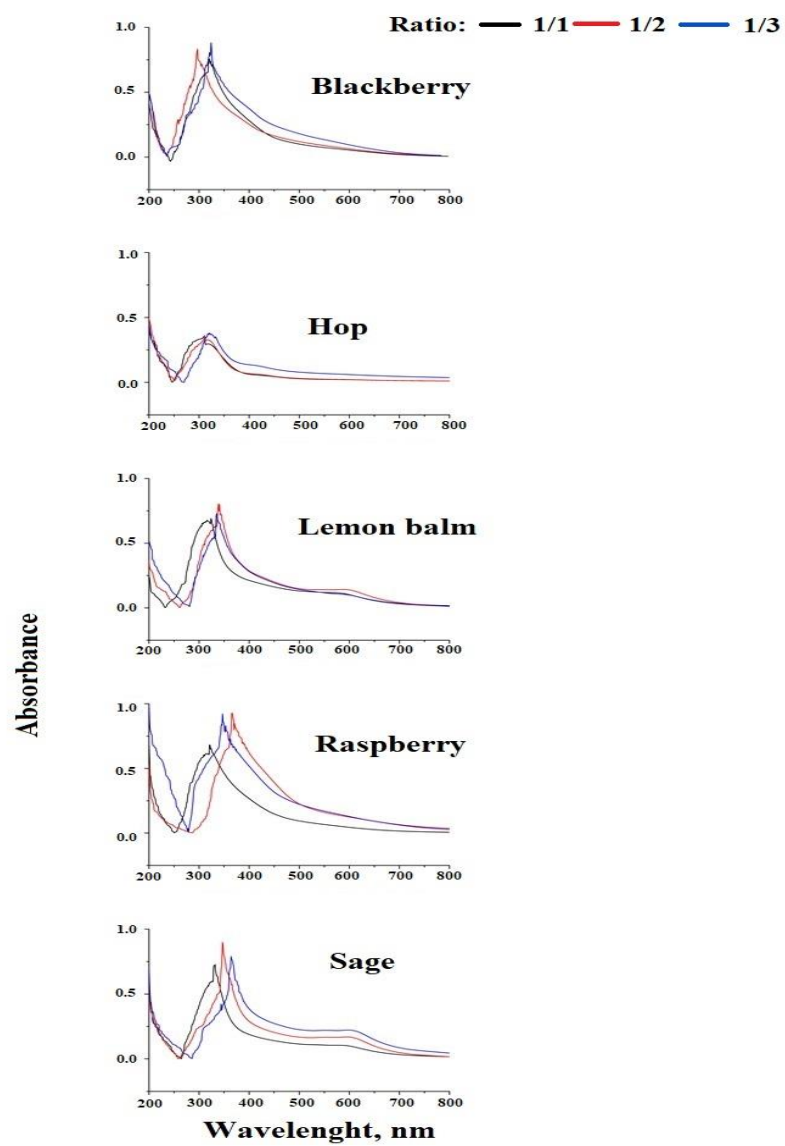

Fig 1S. UV-Vis spectra of synthesized SeNPs.

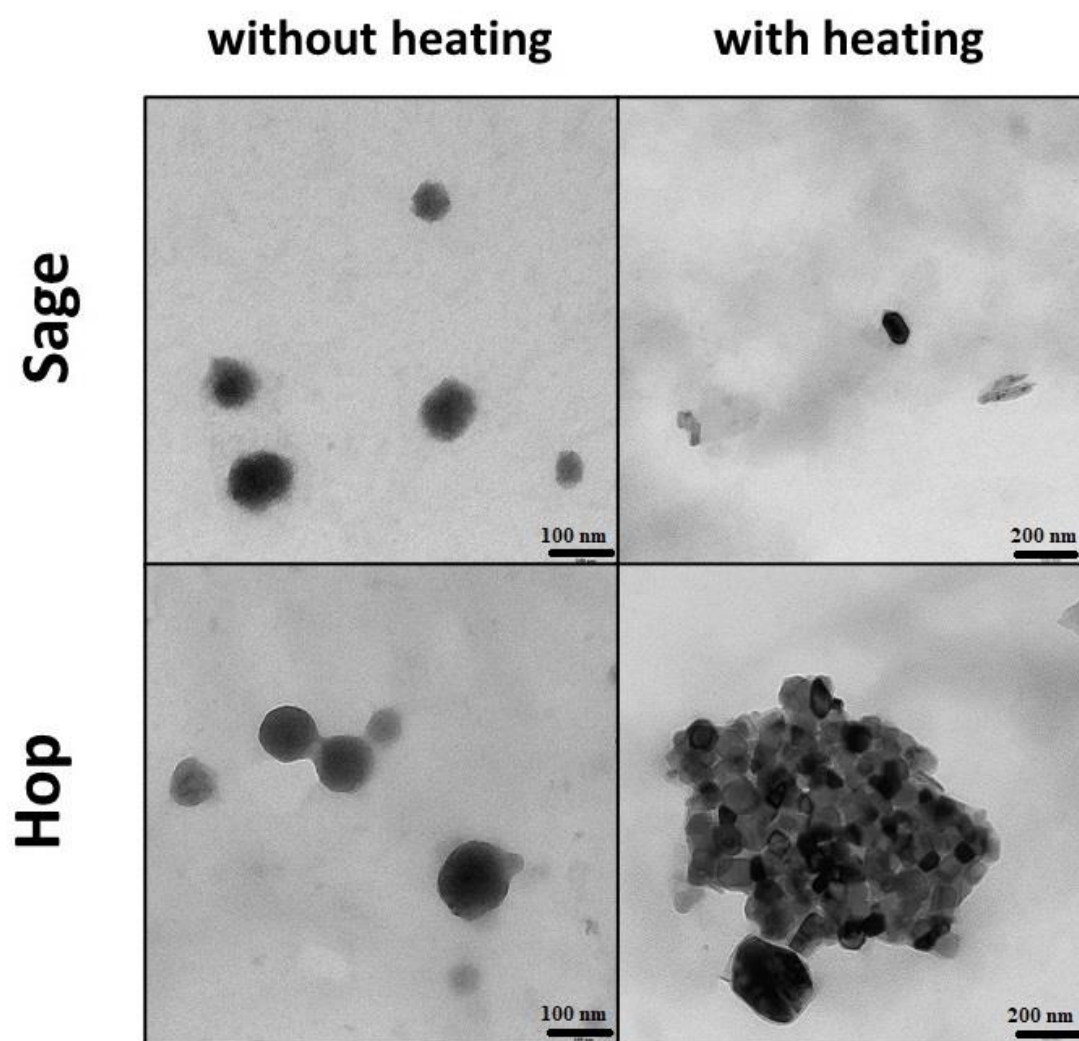

Fig 2S. The influence of post-reaction heating on shape and size of obtained SeNPs on the example of hop and sage.

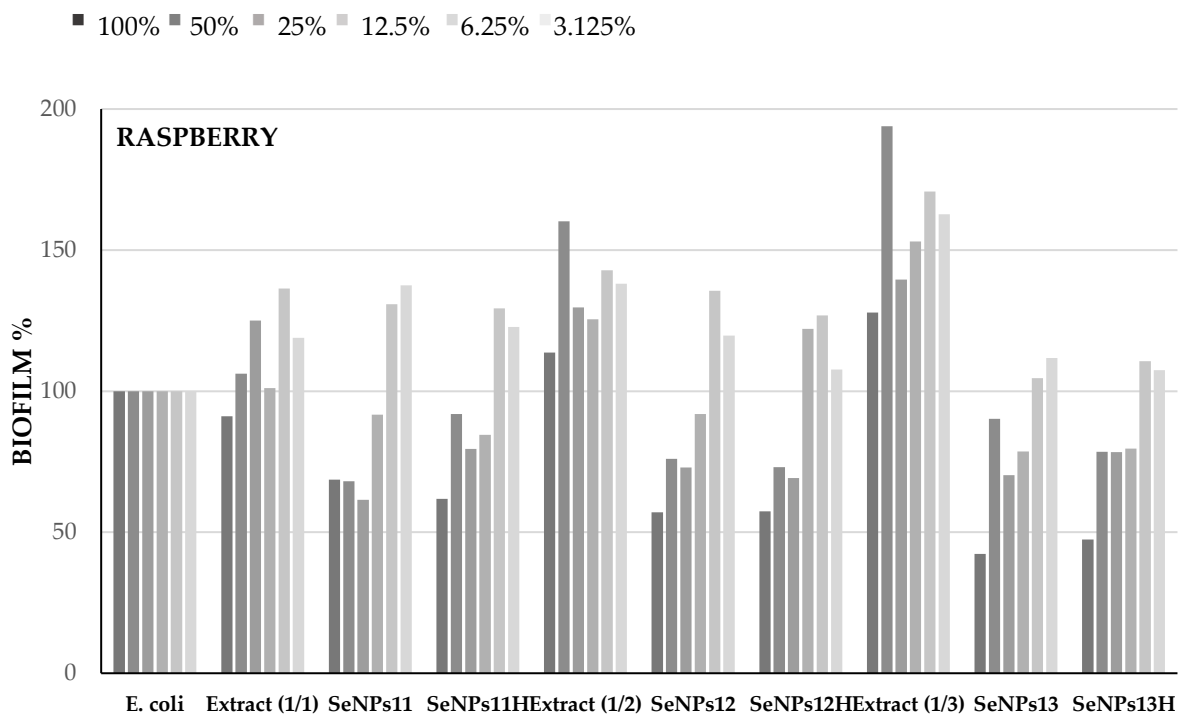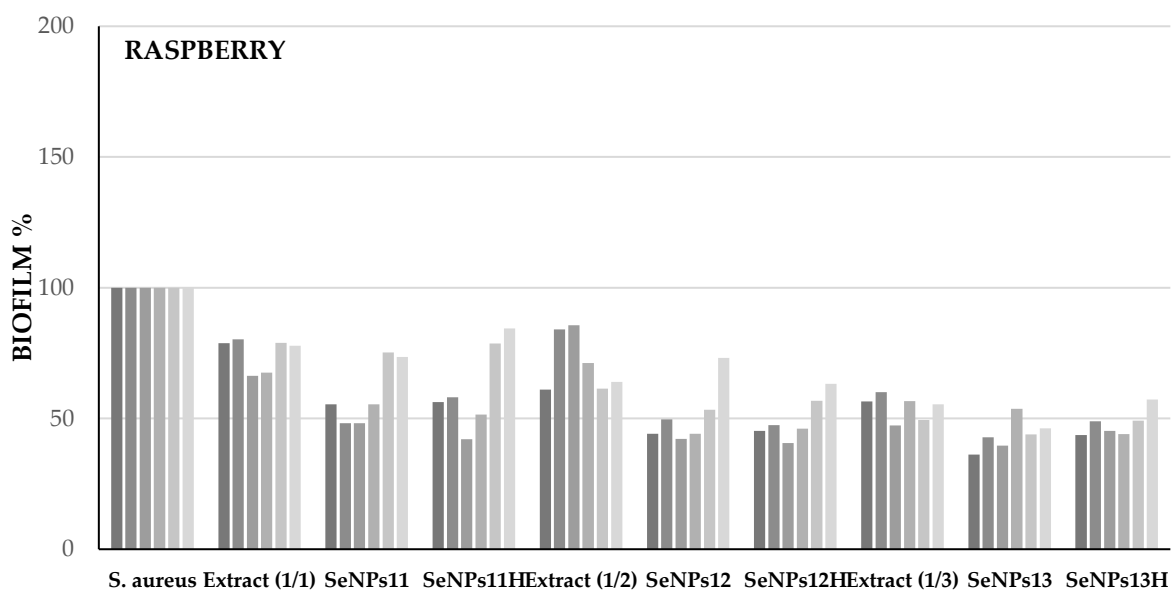

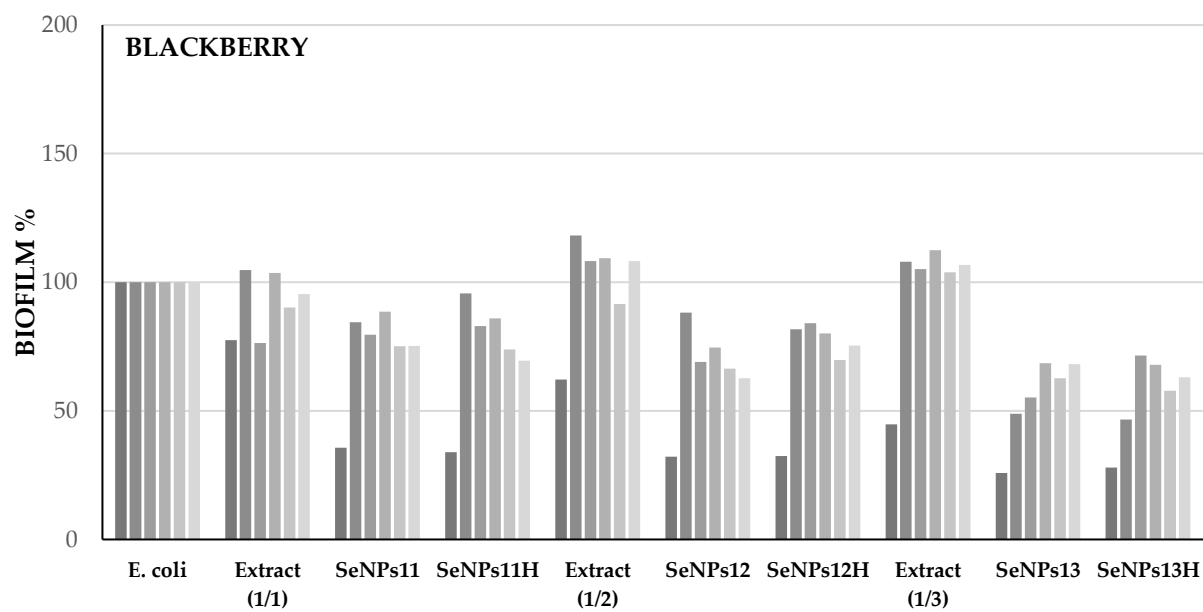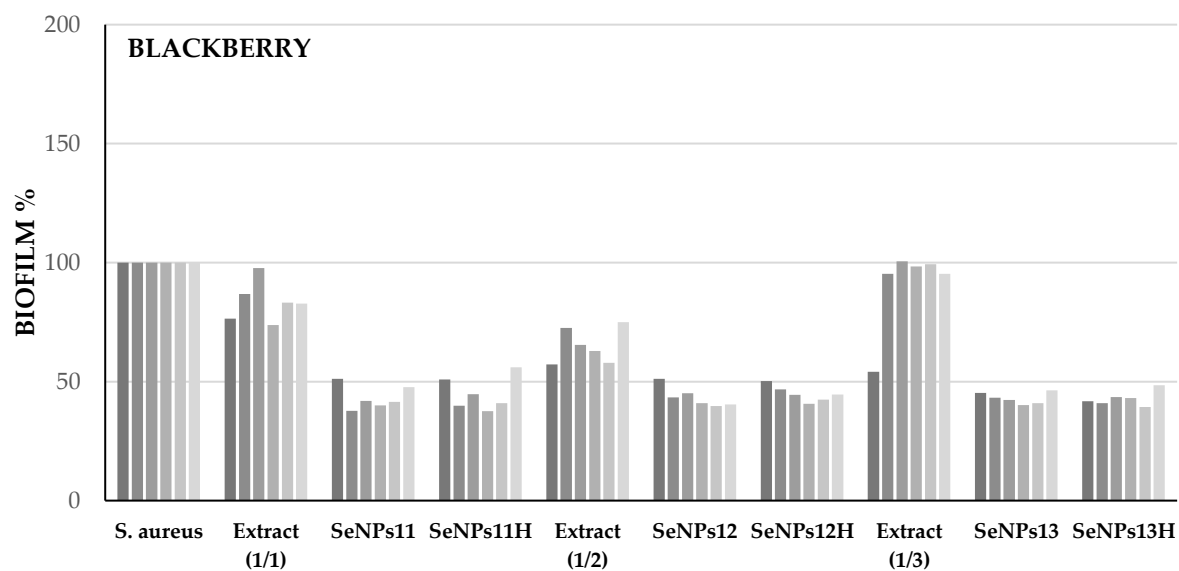

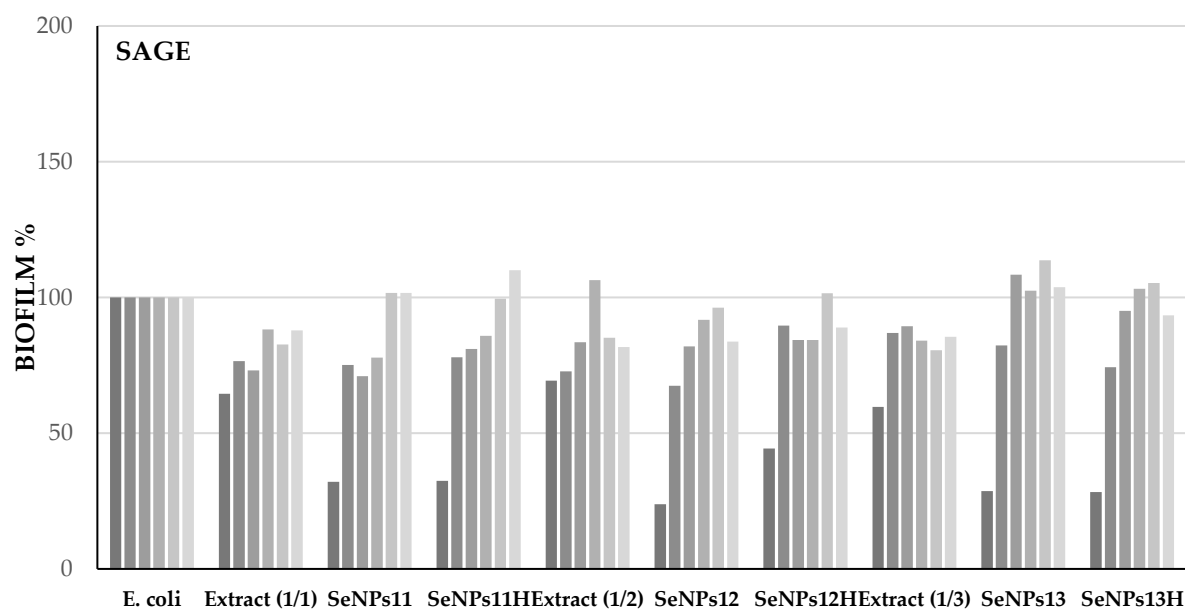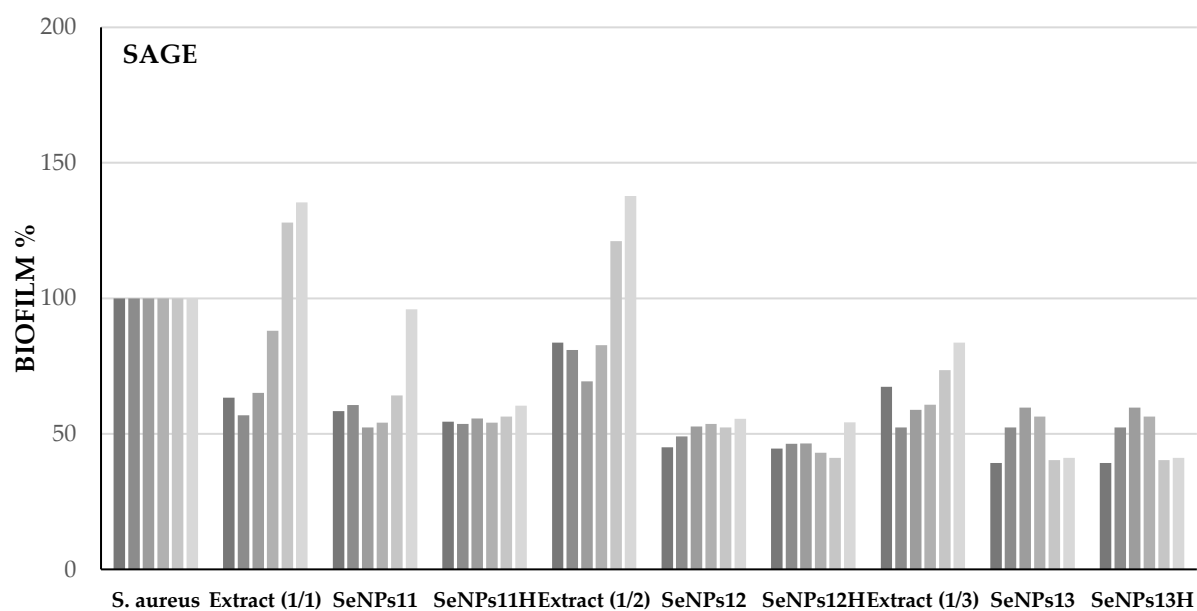

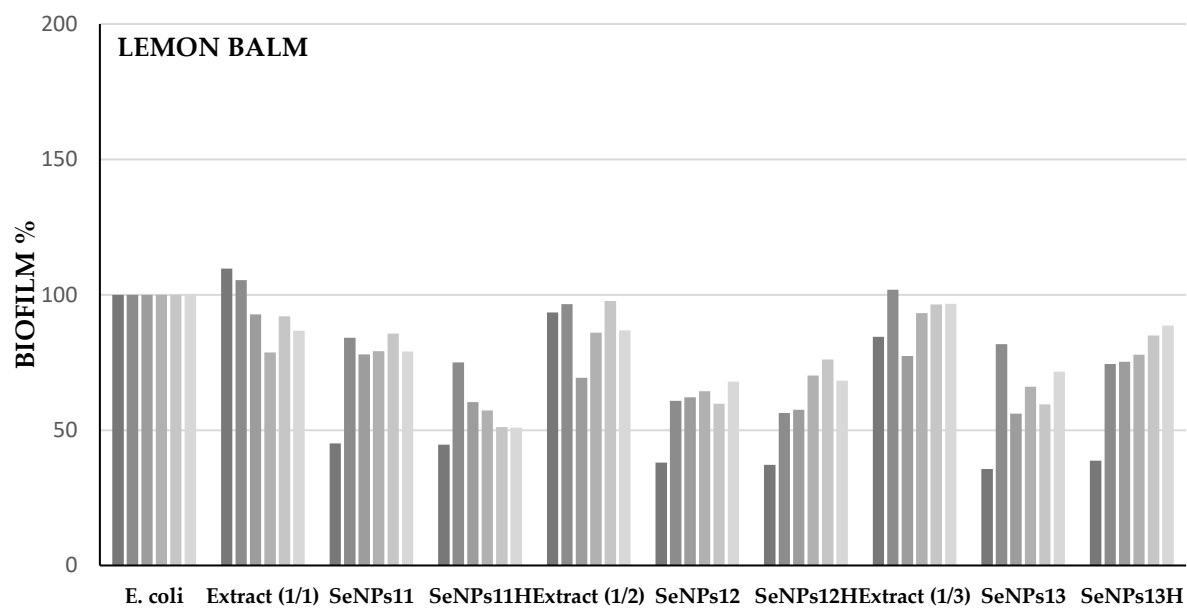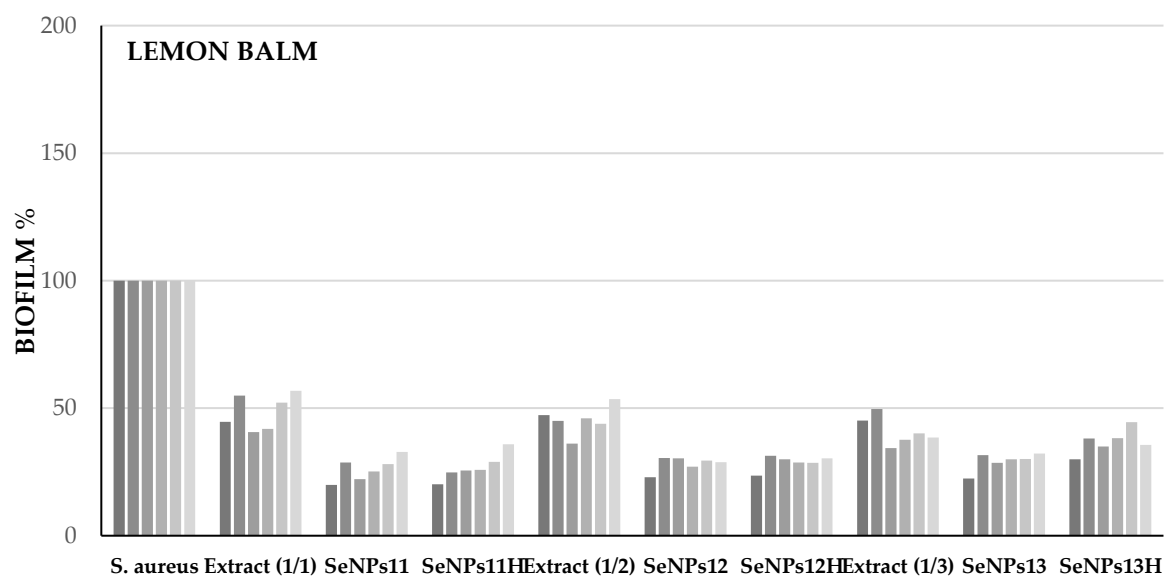

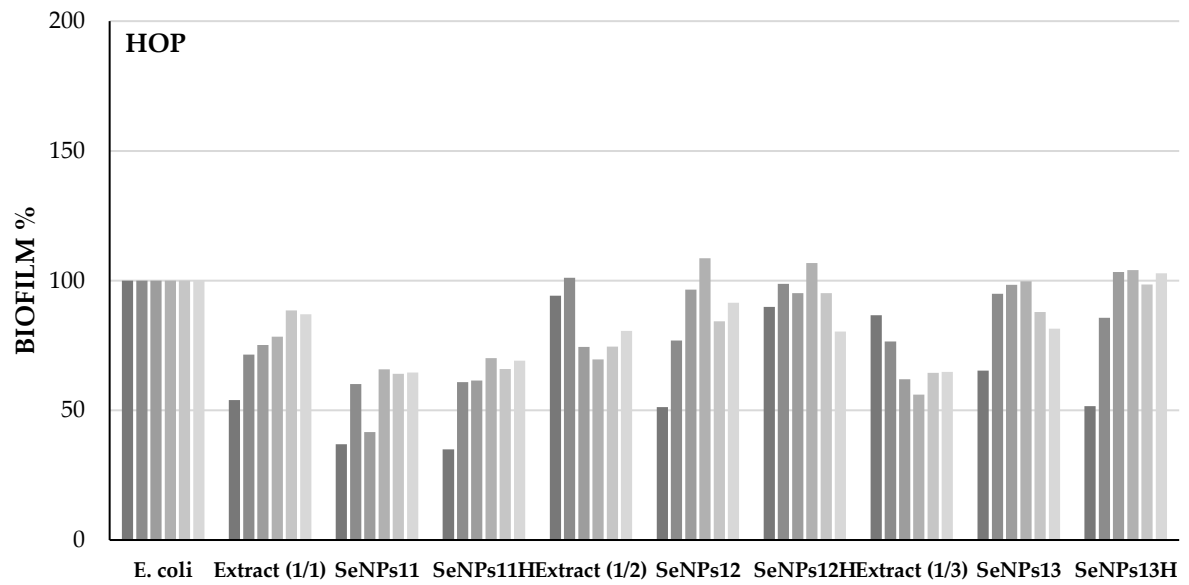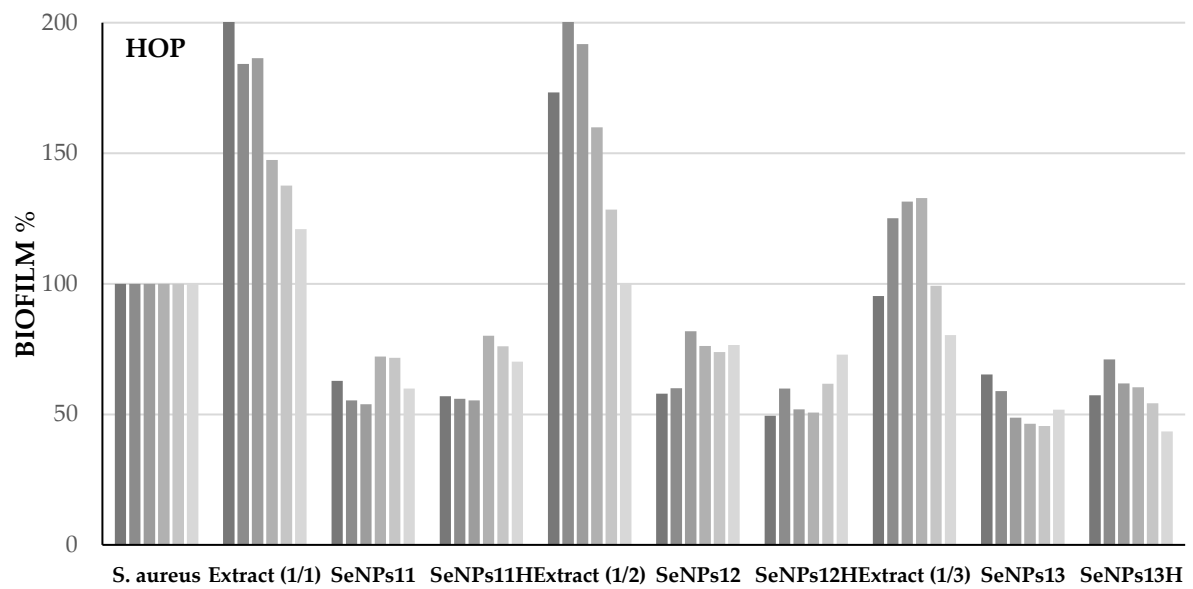



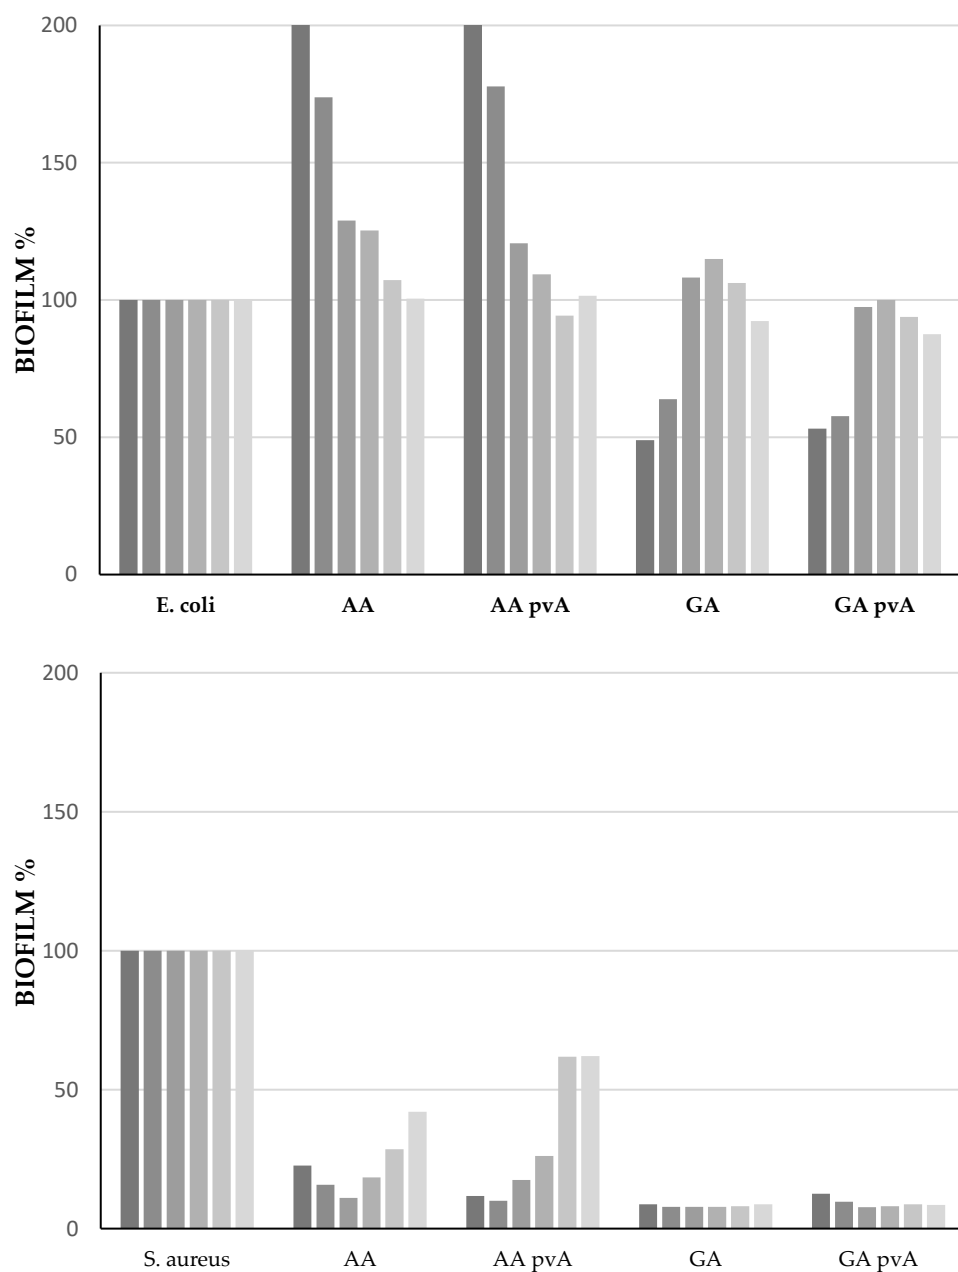

Fig 3S. The results of the biofilm analysis obtained with suspension of SeNPs against biofilms formed by *E. coli* and *S.aureus*.
